# Supplementary material
Source: PubMed Central journal article supplement (PMC6748123)
Supplement: 41418_2018_182_MOESM1_ESM.pdf [file 41418_2018_182_MOESM1_ESM.pdf]

## **Supplementary Information**

### **Biochemical re-programming of human dermal stem cells to neurons by increasing mitochondrial membrane potential**

He Liu, Zhaoyue He, Simon Leonhard April, Marcel Philipp Trefny, Jean-Sébastien Rougier, Souzan Salemi, Radu Olariu, Hans Rudolf Widmer and Hans-Uwe Simon

**The supplementary information contains 5 figures and 1 table.**

**a**

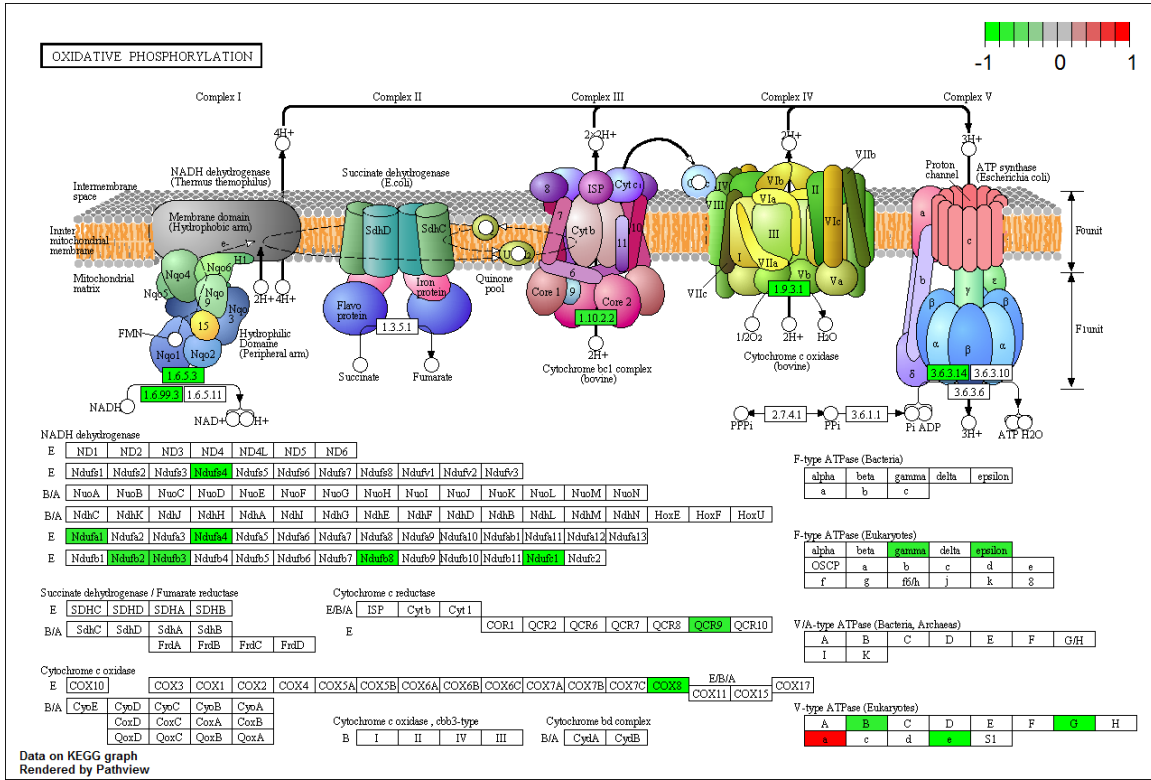

**b**

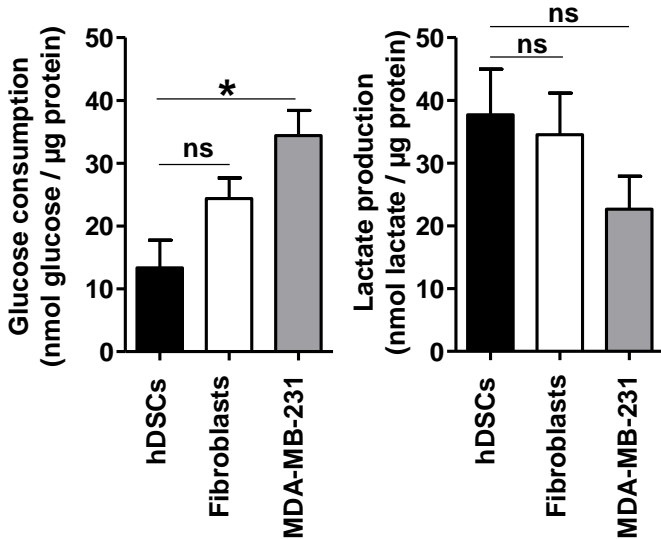

**c**

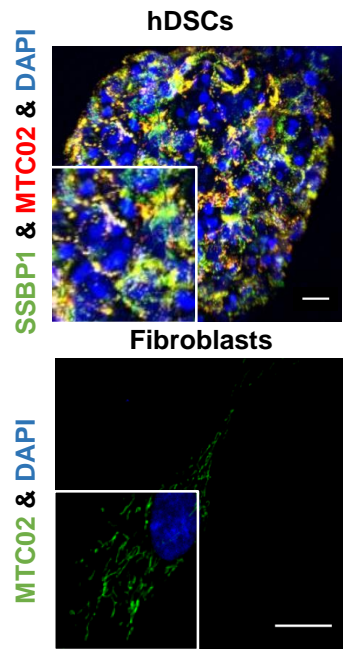

**Fig. S1: hDSCs exhibit an impaired ETC, are glycolytic and show rounded, condensed mitochondria in contrast to autologous fibroblasts with long, tubular mitochondria**

(a) RNA was isolated from hDSCs and from autologous fibroblasts obtained from 3 different donors and assessed with next generation sequencing. The genes engaged in ETC are presented as a KEGG signaling pathway using the Pathview package. Color code: red and green indicate genes which were more highly or less expressed in hDSCs, respectively. (b) Glucose consumption and lactate production were measured in hDSCs and in human fibroblasts as described in the Materials and Methods. The MDA-MB-231 breast cancer cell line, known to rely on glycolysis, serves here as a control. Data shown are means  $\pm$  SDs of 3 independent experiments with cells from 3 different donors. An unpaired one-way ANOVA with Tukey's multiple comparisons test was performed. (c) Representative images of the mitochondria of hDSCs and fibroblasts were obtained by confocal imaging after staining the cells with mitochondrial marker proteins as indicated. The hDSC image shows the mitochondria in cells of an entire spheroid and was rendered with Imaris in 3D from a z-stack of 146 confocal images. The fibroblast mitochondria are illustrated for a single cell. Scale bars: 20  $\mu$ m.

Fibroblast medium

hDSC medium

2 d

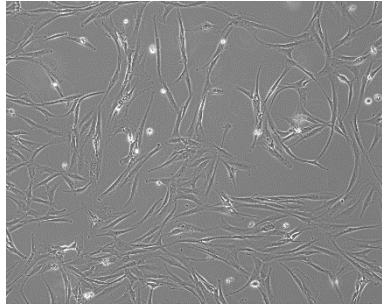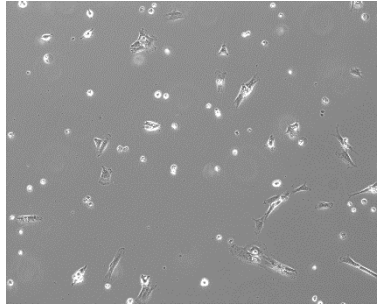

5 d

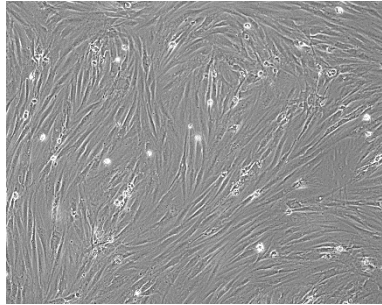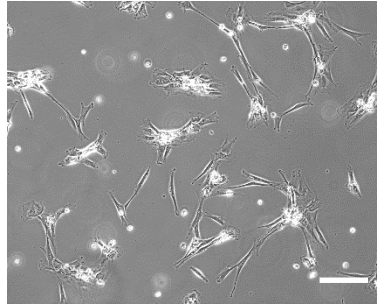

PE  
JC-1  
FITC

5 d

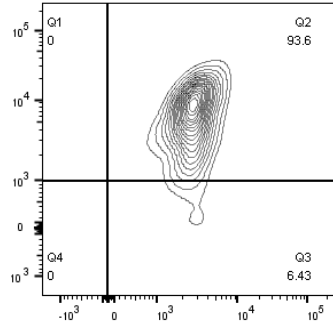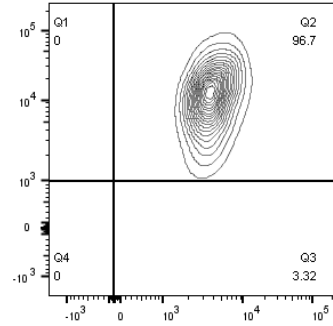

**Fig. S2: Human fibroblasts show a homogeneous cell population with high  $\Delta\Psi_m$  in fibroblast culture media as well as in media used for hDSC culture**

Human fibroblasts were cultured in fibroblast media or in the cell culture media used for hDSCs. Cell morphology was observed and JC-1 staining followed by FACS analysis was performed after 5 days in culture. Human fibroblasts show a homogeneous cell population with high  $\Delta\Psi_m$  under both culture conditions. Scale bar: 100  $\mu\text{m}$ .

**a**

Undifferentiated mNSCs

Differentiated neurons (day 6)

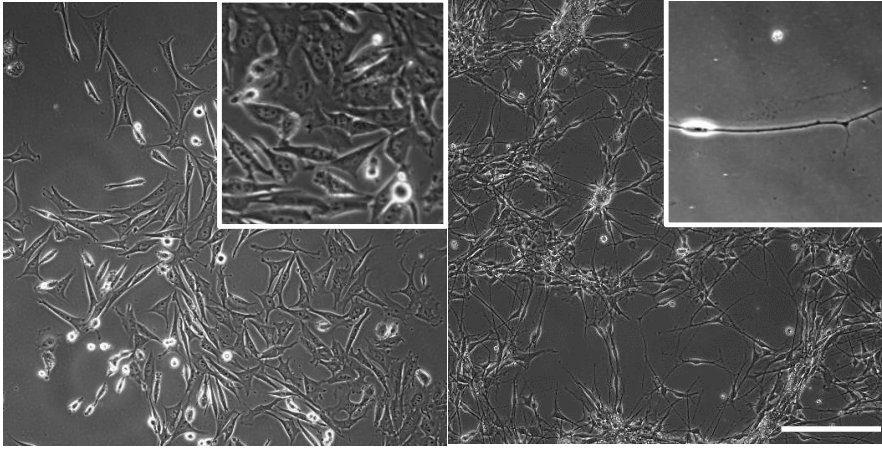

Undifferentiated mNSCs

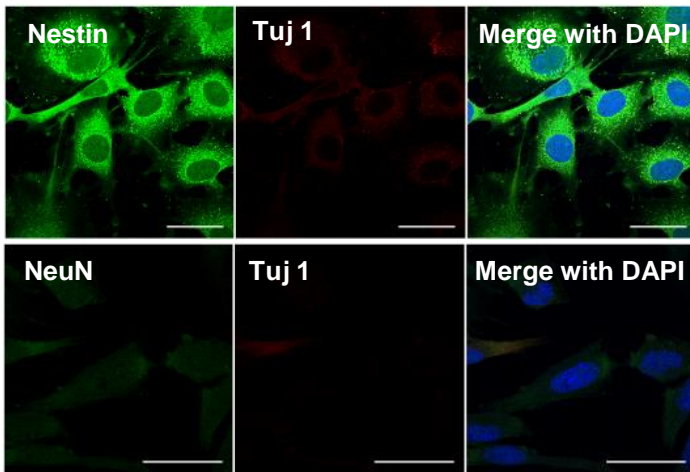

Differentiated neurons (day 6)

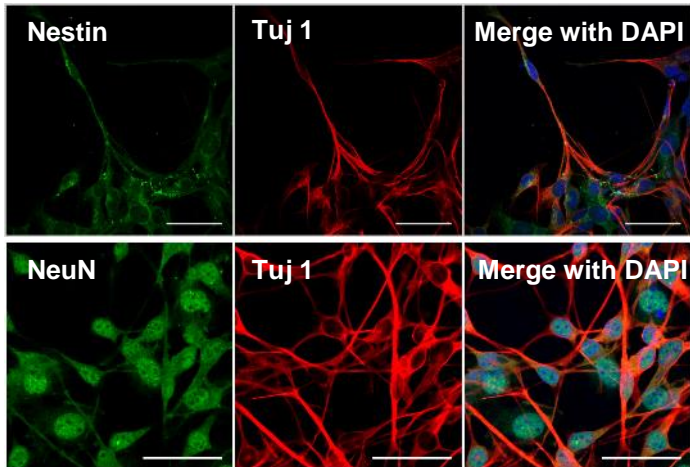**b**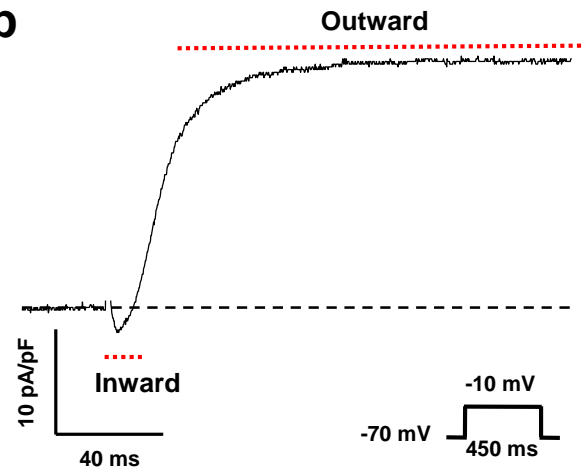**c**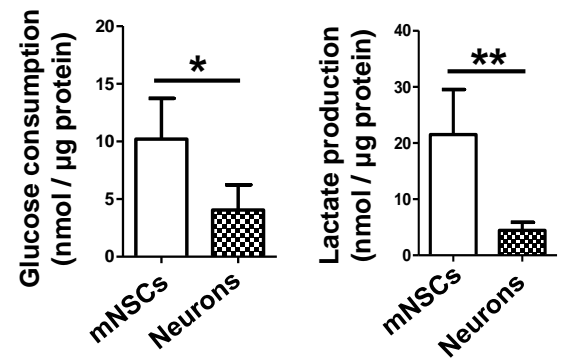

**Fig. S3: mNSCs have a larger mitochondrial content and are more glycolytic than differentiated neurons**

(a) mNSCs were cultured in stem cell medium or neuronal differentiation medium for 6 days before immunofluorescence staining for the stem cell marker Nestin in mNSCs together with the neuronal markers, Tuj1 and NeuN for differentiated neurons. Scale bars: 200  $\mu\text{m}$  (phase contrast) and 50  $\mu\text{m}$  (confocal images). (b) Electrophysiological recording of outward and inward currents in differentiated neurons using whole cell patch clamp recording in voltage-clamp mode. (c) Glucose consumption and lactate production in mNSCs and differentiated neurons were measured. Data shown are means  $\pm$  SDs of 3 independent experiments. An unpaired, two-tailed student t test was performed.

**a****MEK-inhibitor PD98059**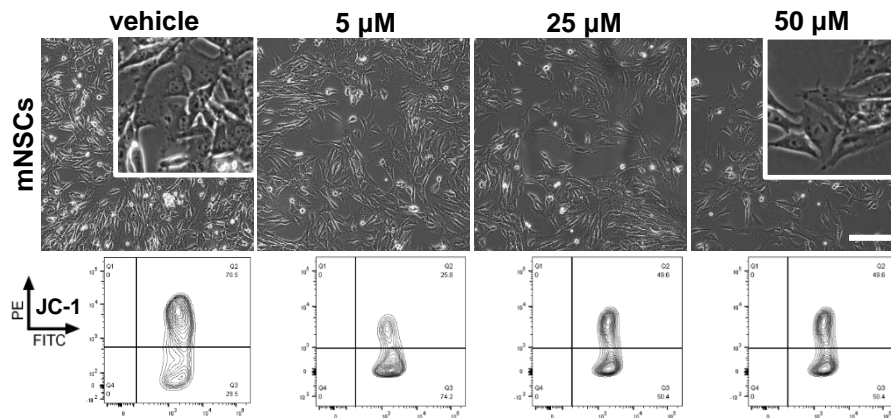**b****25  $\mu$ M of ROCK inhibitor dimethylfasudil in mNSCs**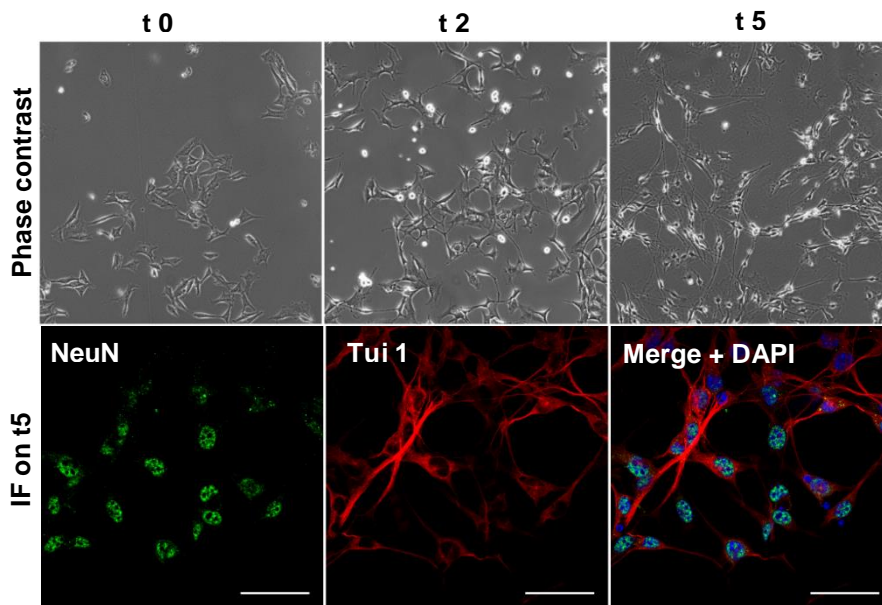**ROCK inhibitor dimethylfasudil in mNSCs**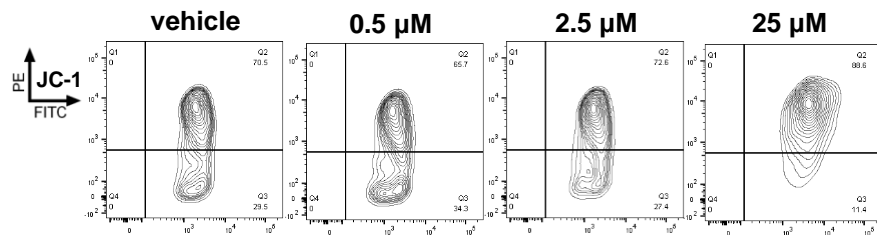



**Fig. S4: The MEK inhibitor does not induce neuronal differentiation of mNSCs, nor in contrast to the ROCK inhibitor, does it increase  $\Delta\Psi_m$**

(a) mNSCs were treated with different concentrations of the MEK inhibitor for 4 days; cell morphology was observed under the light microscope and mitochondrial polarization was analyzed by JC-1 staining. (b) mNSCs were treated with different concentrations of the ROCK inhibitor, dimethylfasudil for 4 days. Cell morphology and the neuron markers, Tuj1 and NeuN were observed after staining.  $\Delta\Psi_m$  was assessed by JC-1 staining. Tuj1 and NeuN double positive neurons were observed when 25  $\mu\text{M}$  of dimethylfasudil were applied to mNSCs for 4 days accompanied with increased  $\Delta\Psi_m$ .

**a**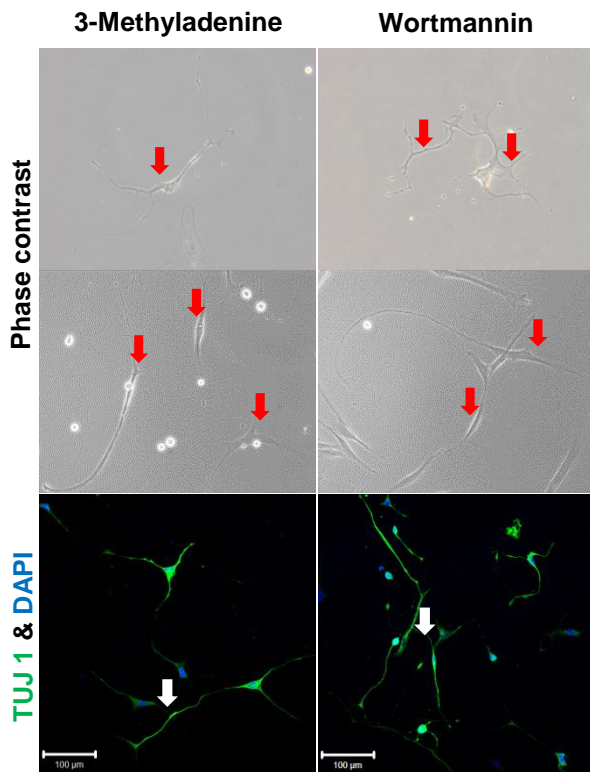**b**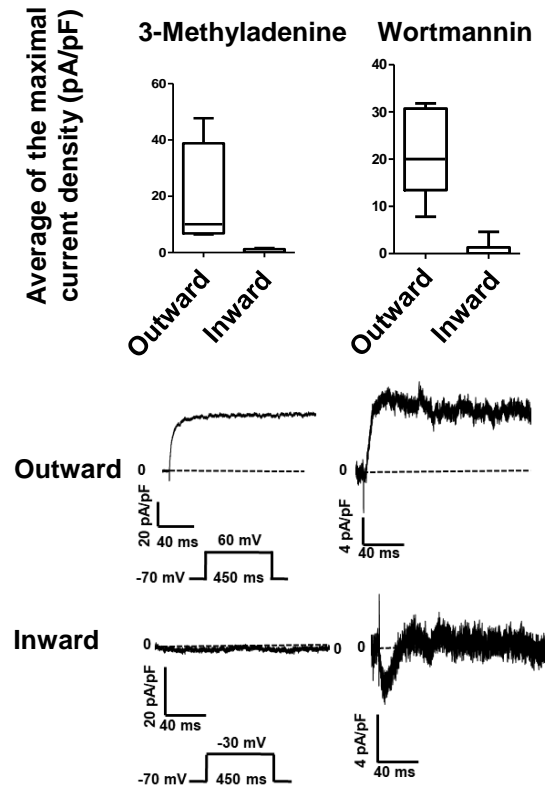

**Fig. S5: Both 3-methyladenine and wortmannin induce neuronal differentiation of hDSCs**

(a) 10 mM of 3-methyladenine or 50  $\mu$ M of wortmannin were applied to hDSCs in DMEM/10%FCS for 7 days to evaluate morphological changes in the cells as well as to detect TUJ1 expression. Neuron-like cells are indicated with red arrows and cell-cell contacts are indicated with white arrows. Scale bars: 100  $\mu$ m. (b) Treated cells were examined in patch clamp experiments. Averages for maximal current density (pA/pF) were obtained with whole-cell currents in voltage-clamp mode; cells were held at -70 mV. Thereafter, step depolarization from -90 mV to +60 mV at 10-mV intervals was performed. Representative traces of outward and inward currents are shown. Data were obtained from 3 independent experiments with cells from 3 different donors.

**Table S1. The list of 37 mitochondrion-encoding genes that were differentially expressed in hDSCs as compared with fibroblasts**

| Ensembl gene_ID | HGNC symbol | Start position | End position | Mean TPM (hDSCs) | Mean TPM (fibroblasts) |
|-----------------|-------------|----------------|--------------|------------------|------------------------|
| ENSG00000210049 | MT-TF       | 577            | 647          | 6.546253437      | 4.453279255            |
| ENSG00000211459 | MT-RNR1     | 648            | 1601         | 3540.727938      | 2232.500724            |
| ENSG00000210077 | MT-TV       | 1602           | 1670         | 15.65646836      | 15.5117618             |
| ENSG00000210082 | MT-RNR2     | 1671           | 3229         | 16438.36956      | 15148.46827            |
| ENSG00000209082 | MT-TL1      | 3230           | 3304         | 236.8893434      | 174.1251035            |
| ENSG00000198888 | MT-ND1      | 3307           | 4262         | 4959.599944      | 3705.037042            |
| ENSG00000210100 | MT-TI       | 4263           | 4331         | 57.92035175      | 22.6255555             |
| ENSG00000210107 | MT-TQ       | 4329           | 4400         | 9.879680449      | 3.493799614            |
| ENSG00000210112 | MT-TM       | 4402           | 4469         | 26.58710765      | 16.97342013            |
| ENSG00000198763 | MT-ND2      | 4470           | 5511         | 4191.42372       | 2152.184832            |
| ENSG00000210117 | MT-TW       | 5512           | 5579         | 5.723560479      | 4.792031676            |
| ENSG00000210127 | MT-TA       | 5587           | 5655         | 15.47672445      | 8.811264652            |
| ENSG00000210135 | MT-TN       | 5657           | 5729         | 6974.479242      | 8954.513716            |
| ENSG00000210140 | MT-TC       | 5761           | 5826         | 3263.641389      | 4109.656271            |
| ENSG00000210144 | MT-TY       | 5826           | 5891         | 154.3081472      | 217.764941             |
| ENSG00000198804 | MT-CO1      | 5904           | 7445         | 26078.84259      | 19894.04387            |
| ENSG00000210151 | MT-TS1      | 7446           | 7514         | 6.632042157      | 8.290634983            |
| ENSG00000210154 | MT-TD       | 7518           | 7585         | 27.06963649      | 29.13355298            |
| ENSG00000198712 | MT-CO2      | 7586           | 8269         | 19135.83081      | 16120.31244            |
| ENSG00000210156 | MT-TK       | 8295           | 8364         | 20.17834409      | 16.72521946            |
| ENSG00000228253 | MT-ATP8     | 8366           | 8572         | 9145.660901      | 5720.899929            |
| ENSG00000198899 | MT-ATP6     | 8527           | 9207         | 9449.575612      | 6130.773683            |
| ENSG00000198938 | MT-CO3      | 9207           | 9990         | 16895.57068      | 11414.60903            |
| ENSG00000210164 | MT-TG       | 9991           | 10058        | 111.9310765      | 61.17073927            |
| ENSG00000198840 | MT-ND3      | 10059          | 10404        | 6570.507313      | 4890.69957             |
| ENSG00000210174 | MT-TR       | 10405          | 10469        | 372.7425099      | 218.2913479            |
| ENSG00000212907 | MT-ND4L     | 10470          | 10766        | 20368.66284      | 16249.82546            |
| ENSG00000198886 | MT-ND4      | 10760          | 12137        | 7609.246856      | 6486.99096             |
| ENSG00000210176 | MT-TH       | 12138          | 12206        | 551.805587       | 210.3987301            |
| ENSG00000210184 | MT-TS2      | 12207          | 12265        | 240.6736373      | 111.8878472            |
| ENSG00000210191 | MT-TL2      | 12266          | 12336        | 112.545851       | 34.33214645            |
| ENSG00000198786 | MT-ND5      | 12337          | 14148        | 6393.090686      | 4570.713491            |
| ENSG00000198695 | MT-ND6      | 14149          | 14673        | 4562.521656      | 2703.935053            |
| ENSG00000210194 | MT-TE       | 14674          | 14742        | 69.92235622      | 40.43757188            |
| ENSG00000198727 | MT-CYB      | 14747          | 15887        | 9587.458971      | 6050.60138             |
| ENSG00000210195 | MT-TT       | 15888          | 15953        | 30.7348021       | 27.54944182            |
| ENSG00000210196 | MT-TP       | 15956          | 16023        | 4494.546722      | 5357.410913            |

HGNC: HUGO Gene Nomenclature Committee
